# Supplementary material for: Rapid Screening of Lipase Inhibitors in Scutellaria baicalensis by Using Porcine Pancreatic Lipase Immobilized on Magnetic Core–Shell Metal–Organic Frameworks
Source: MDPI journal article supplement (doi:10.3390/molecules27113475), 2022-05-27
Supplement: s1 [file s1]

## Supporting information

### **Rapid Screening of Lipase Inhibitors in *Scutellaria Baicalensis* by Using Porcine Pancreatic Lipase Immobilized on Magnetic Core-Shell Metal-Organic Frameworks**

Jinfang Xu † , Pengkun Cao † , Zhiyu Fan, Xujing Luo, Gangqiang Yang, Tingli Qu,  
Jianping Gao\*

School of Pharmacy, Shanxi Medical University, 56 Xinjian Road, Taiyuan 030001, People's  
Republic of China; xujinfang@sxmu.edu.cn (J.X.); caopengkun9257@163.com (P.C.);  
13834405334@163.com (Z.F.); Luoxujing08@163.com (X.L.); yanggangqiang2021@163.com  
(G.Y.); qutingli@126.com (T.Q.)

\* Correspondence: Jianping Gao, E-mail: jpgao123@163.com; Tel.: +86-0351-398-5244

† Authors contributed equally to this work

## Contents

|                                                                                                                                                  |   |
|--------------------------------------------------------------------------------------------------------------------------------------------------|---|
| Figure S1. MS spectrum of the methanol eluent of the ligand fishing by Fe <sub>3</sub> O <sub>4</sub> -COOH@UiO-6<br>6-NH <sub>2</sub> @PPL..... | 3 |
| Figure S2. MS/MS spectrum of compound 1 (2', 3, 5, 6', 7-pentahydroxyflavanone).....                                                             | 3 |
| Figure S3. MS/MS spectrum of compounds 2 (scutellarein) .....                                                                                    | 4 |
| Figure S4. MS/MS spectrum of compound 3 (baicalin) .....                                                                                         | 4 |
| Figure S5. MS/MS spectrum of compound 4 (oroxylside) .....                                                                                       | 5 |
| Figure S6. MS/MS spectrum of compound 5 (wogonoside).....                                                                                        | 5 |
| Figure S7. MS/MS spectrum of compound 6 (skullcapflavone II ).....                                                                               | 6 |
| Figure S8. MS/MS spectrum of compound 7 (wogonin) .....                                                                                          | 6 |
| Figure S9. MS/MS spectrum of compound 8 (oroxylin A).....                                                                                        | 7 |

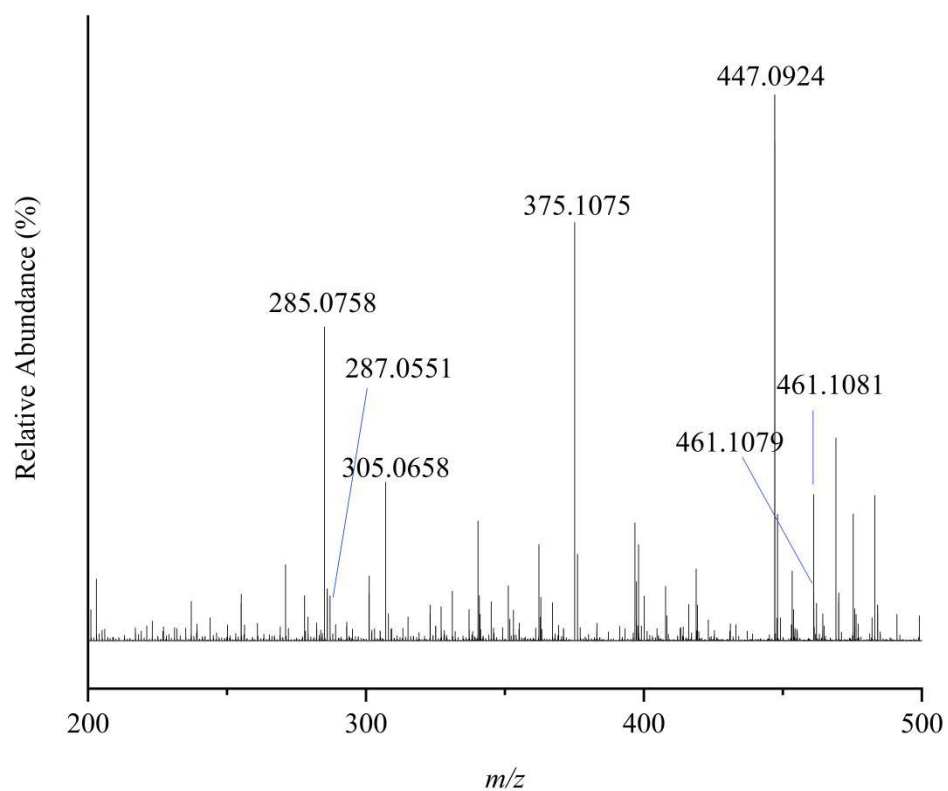

**Figure S1.** MS spectrum of the methanol eluent of the ligand fishing by  $\text{Fe}_3\text{O}_4\text{-COOH@UiO-66-NH}_2\text{@PPL}$

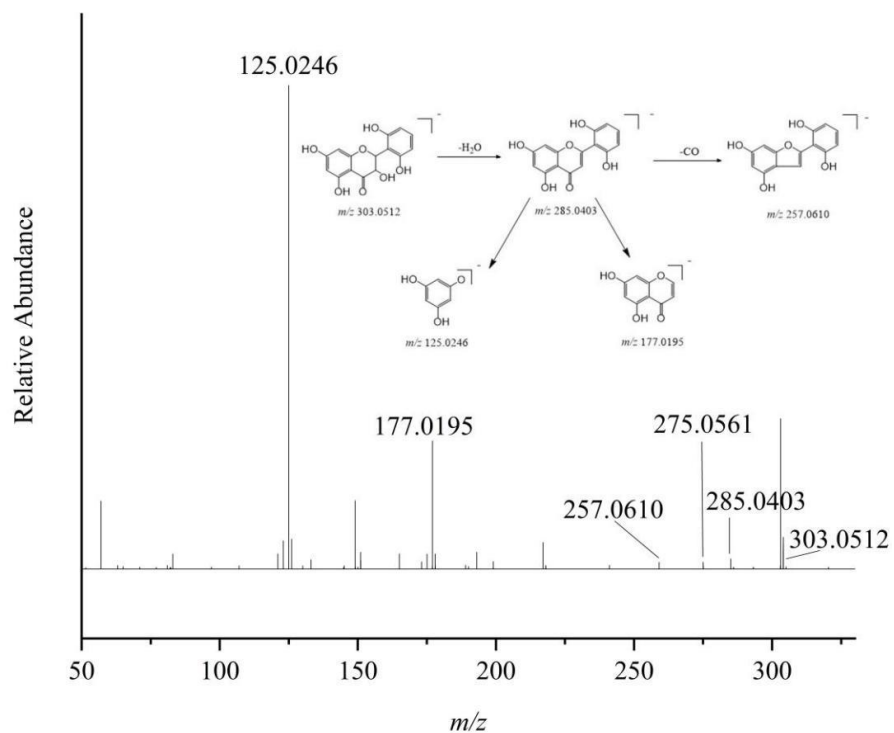

**Figure S2.** MS/MS spectrum of compound **1** (2', 3, 5, 6', 7-pentahydroxyflavanone)

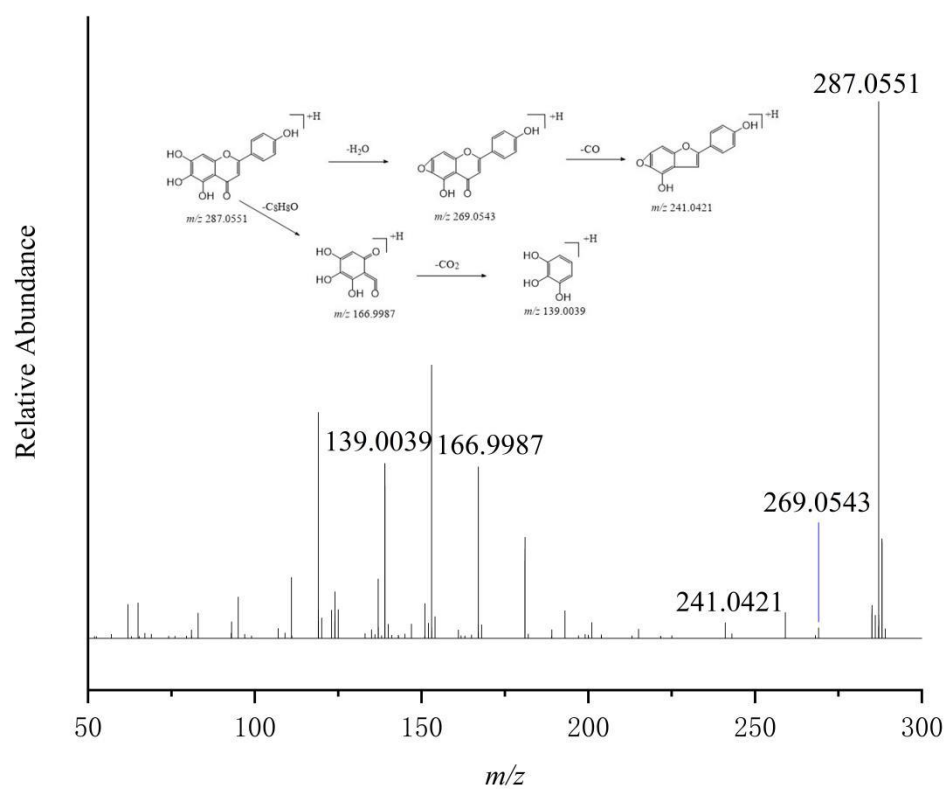

**Figure S3.** MS/MS spectrum of compound **2** (scutellarein)

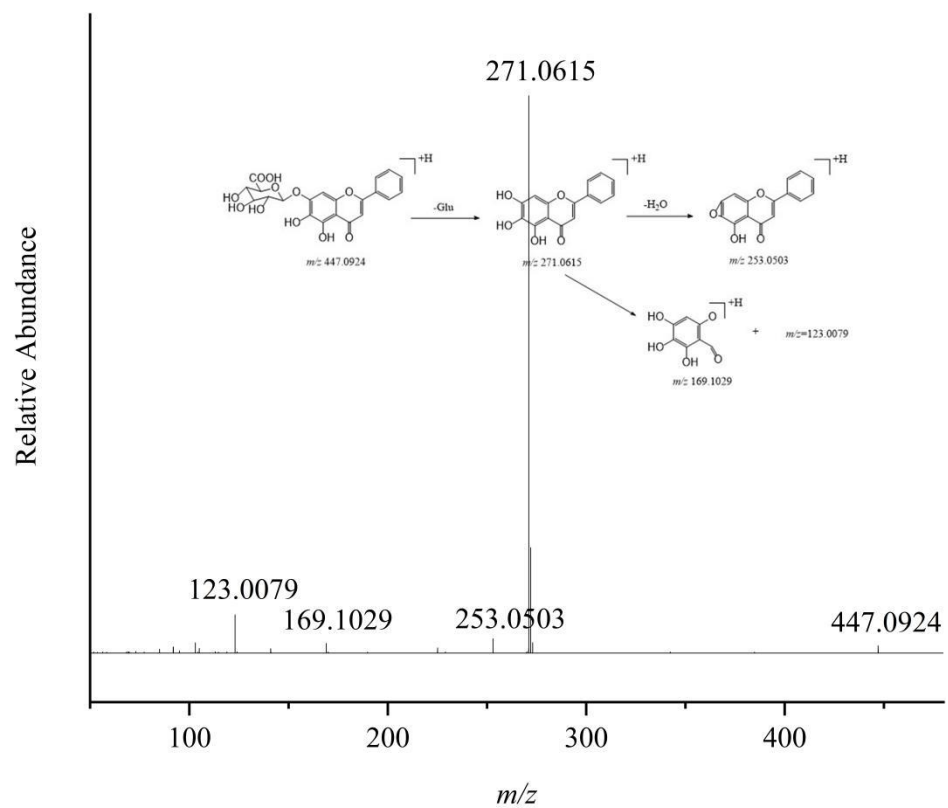

**Figure S4.** MS/MS spectrum of compound **3** (baicalin)

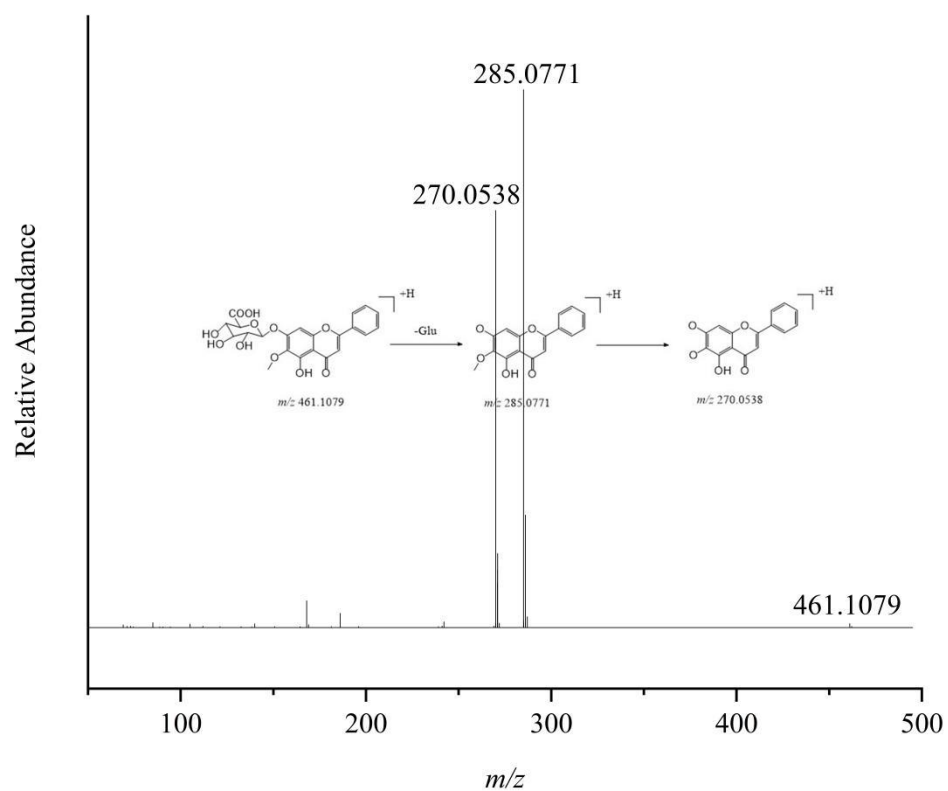

**Figure S5.** MS/MS spectrum of compound **4** (oroxyloside)

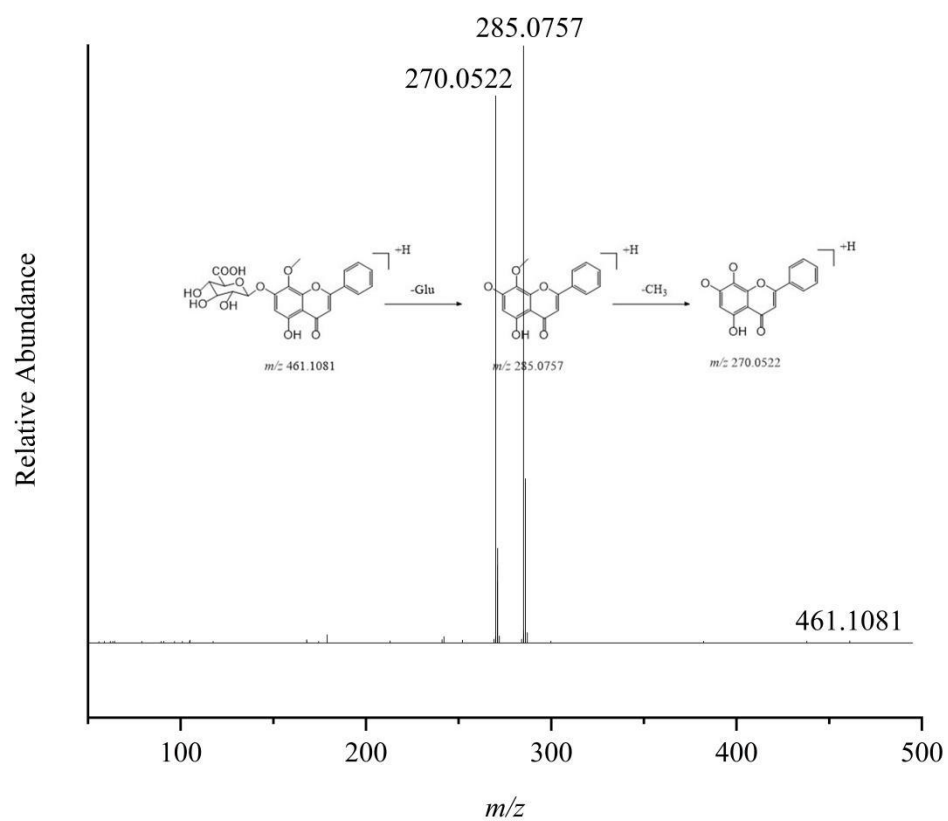

**Figure S6.** MS/MS spectrum of compound **5** (wogonoside)

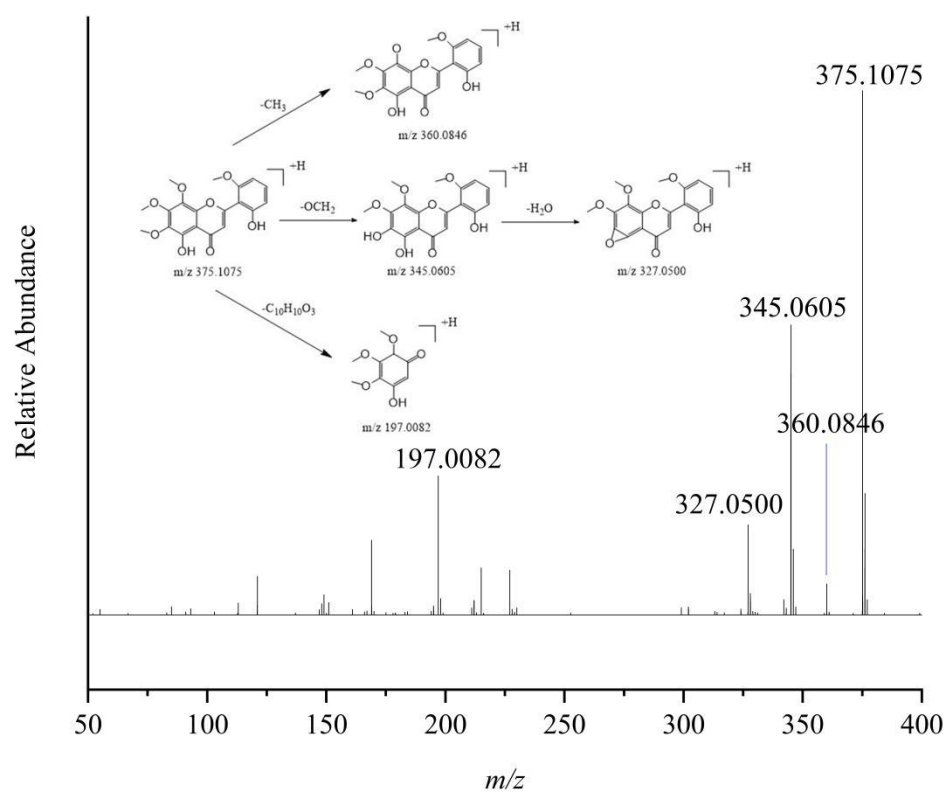

**Figure S7.** MS/MS spectrum of compound **6** (skullcapflavone II)

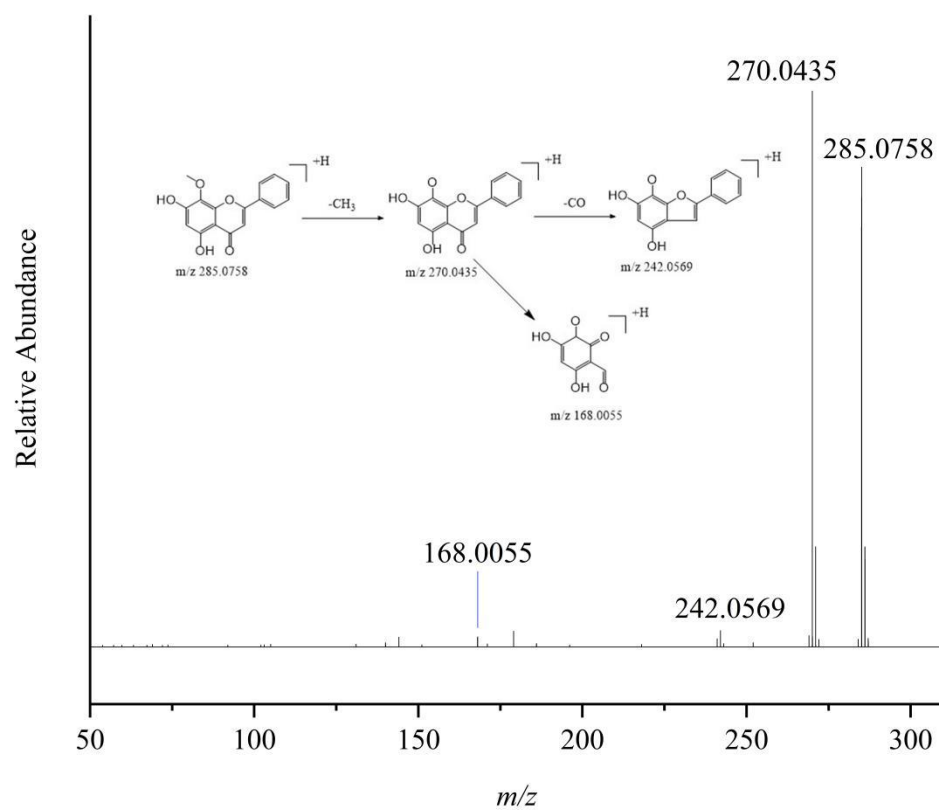

**Figure S8.** MS/MS spectrum of compound **7** (wogonin)

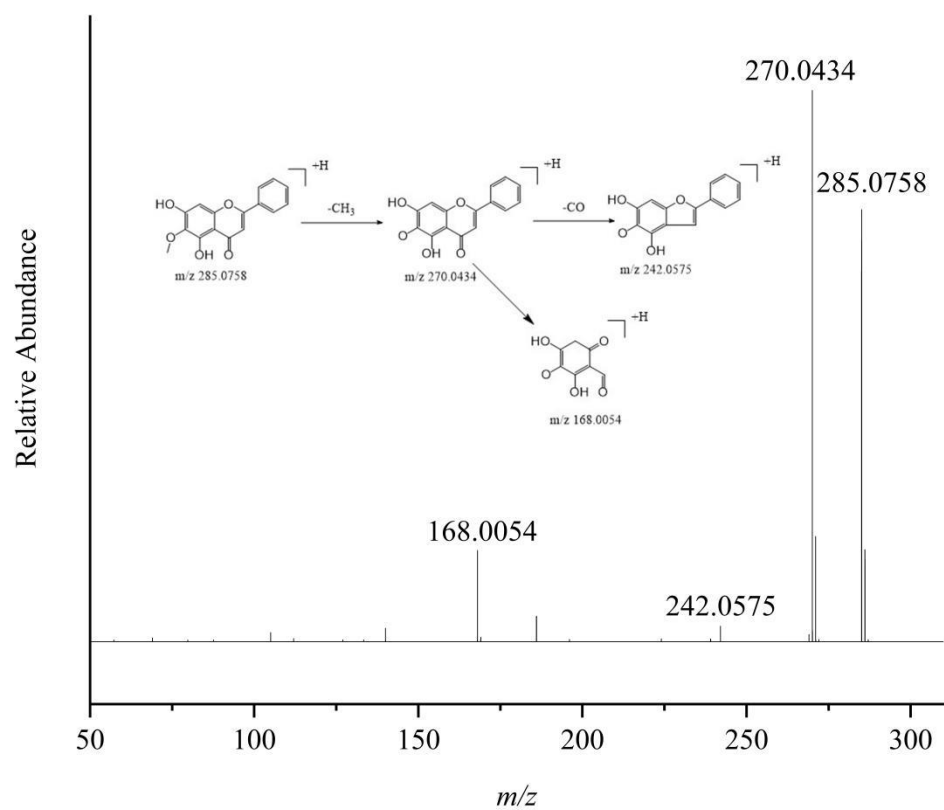

**Figure S9.** MS/MS spectrum of compound **8** (oroxylin A)
